# Supplementary material for: Prepectoral versus Subpectoral Breast Reconstruction after Nipple-sparing Mastectomy: A Systematic Review and Meta-Analysis
Source: PubMed Central journal article supplement — Plast Reconstr Surg Glob Open. 2024 May 14;12(5):e5808. doi: 10.1097/GOX.0000000000005808 (PMC11093580; doi:10.1097/gox.0000000000005808), 2024-05-14
Supplement: gox-12-e5808-s001.pdf [file gox-12-e5808-s001.pdf]

## Supplemental Digital Content 1

Search Strategy for PubMed:

(Mammaplasty OR Mammoplasties OR Breast Reconstruction OR Breast Reconstructions OR Implant-Based Reconstruction OR Implant-Based Reconstructions OR Implant-Based Breast Reconstruction OR Implant-Based Breast Reconstructions OR Implant Based Reconstruction OR Implant Based Reconstructions OR Implant Based Breast Reconstruction OR Implant Based Breast Reconstructions OR [(Breast\* OR Mammar\*) AND (Implant OR Implants OR Reconstruction\* OR Proesthe\* OR "Prostheses and Implants")]) AND (Nipple Sparing Mastectomy OR Nipple Sparing Mastectomies OR Nipple-Sparing Mastectomy OR Nipple-Sparing Mastectomies OR Mastectomy, Subcutaneous OR Mastectomies, Subcutaneous OR Subcutaneous Mastectomy OR Subcutaneous Mastectomies) AND (Subcutaneous OR Prepectoral OR Prepec OR Pre-pectoral OR Pre-pec OR Dual Plane OR Dual Plane OR Submuscular OR Sub-muscular OR Subpectoral OR Sub-pectoral)
