# Supplementary figures and images for: Prepectoral versus Subpectoral Breast Reconstruction after Nipple-sparing Mastectomy: A Systematic Review and Meta-Analysis
Source: PubMed Central journal article supplement — Plast Reconstr Surg Glob Open. 2024 May 14;12(5):e5808. doi: 10.1097/GOX.0000000000005808 (PMC11093580; doi:10.1097/gox.0000000000005808), 2024-05-14

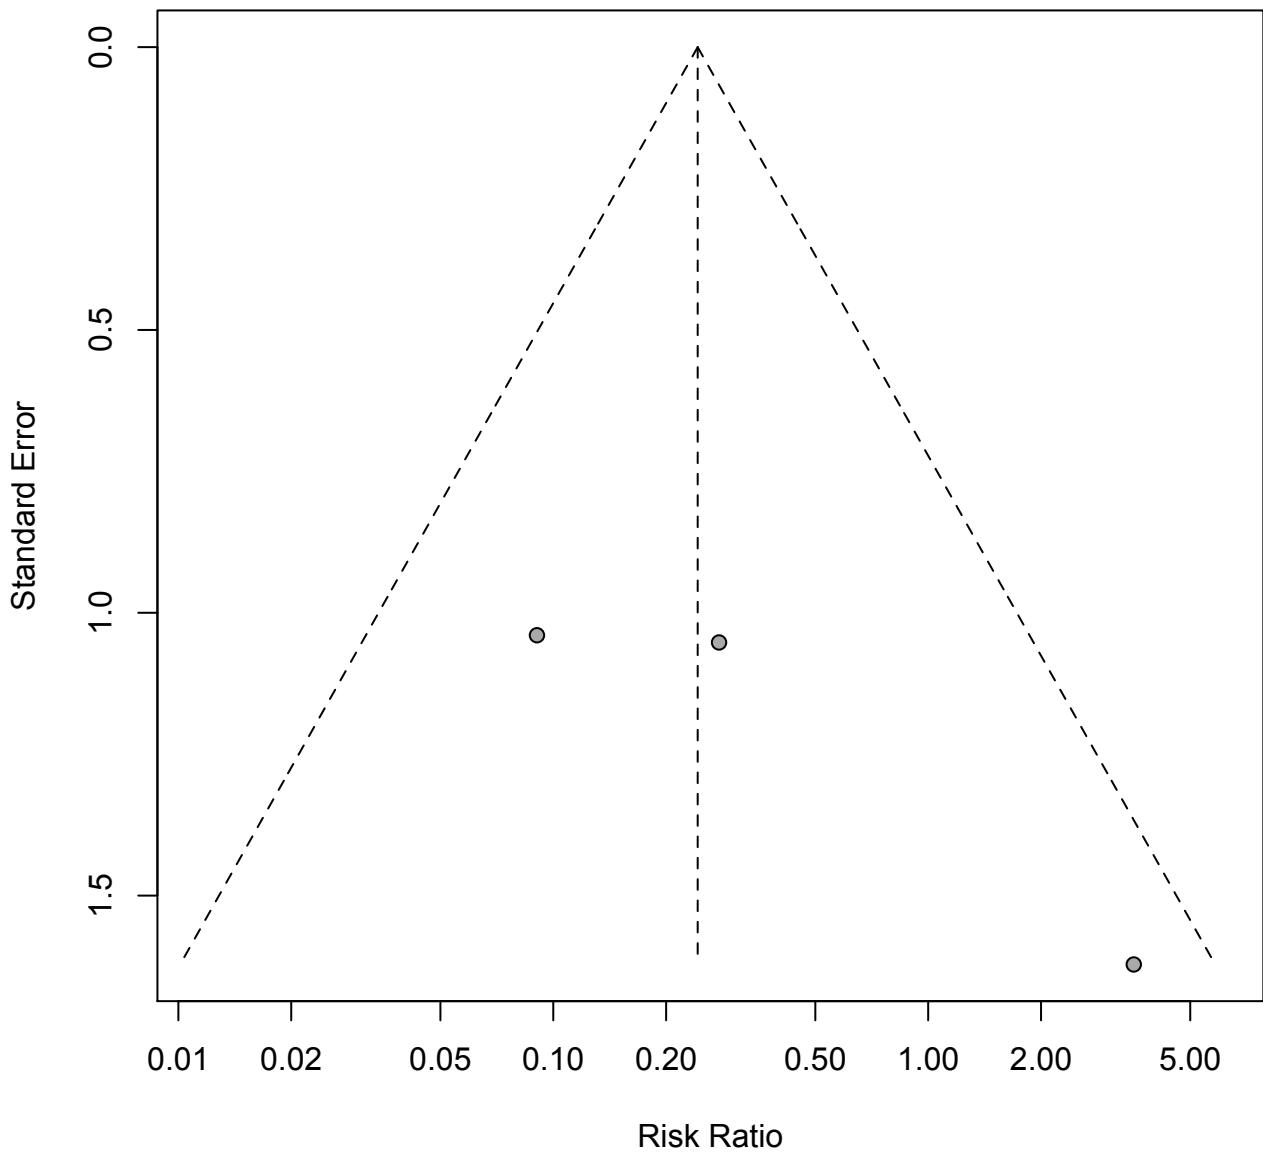

Supplement: gox-12-e5808-s002.pdf [file gox-12-e5808-s002.pdf]
